# Supplementary material
Source: PubMed Central journal article supplement (PMC3773727)
Supplement: NIHMS176006-supplement-supplementary_data.pdf [file NIHMS176006-supplement-supplementary_data.pdf]

A K **D** A K K E Q  
A K **D** A K K E Q  
A K **D** A K K E Q  
A K E A K K E Q

A K **D** A K K E Q  
A K **D** A K K E Q  
A K **D** A K K E Q  
A K **D** A K K E Q  
A K E A K K **Q** Q  
A K **D** A K K E Q

- - - - -  
A **I** E A K K **Q** Q  
A I E A K K Q Q  
A I E A K K Q Q  
A I E A K K Q Q  
A I E A K K Q Q  
A I E A K K Q Q  
A I E A K K Q Q  
A I E A K K Q Q  
A I E A K K Q Q  
A I E A K K Q Q  
A I E A K K Q Q  
A I E A K K Q Q  
A I E A K K Q Q  
A I E A K K Q Q  
- - E A K K E Q  
- - E A K K E Q  
A K E A K K E Q  
A K E A K K E Q  
A K E A K K E Q  
A K E A K K E Q  
A K **D** A K K E Q  
A K **D** A K K E Q  
A K **D** A K K E Q

-synonymous  
ate incomplete
